# Supplementary material
Source: Springer Nature journal article supplement (https://www.springermedizin.de/resource/supplementary/13049_2011_482_MOESM5_ESM.pdf/9666498)

### Success rate & BLS education

100%  
90%  
80%  
70%  
60%  
50%  
40%  
30%  
20%  
10%  
0%

first aid

no first aid

first aid <1  
yrs.

first aid  
<1-4 yrs.

first aid  
<5-10 yrs.

first aid  
>10 yrs.

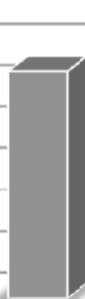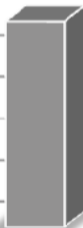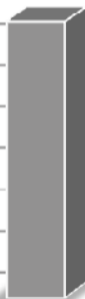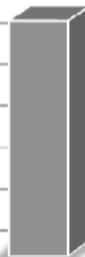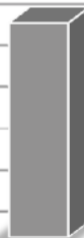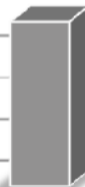

Supplement: MOESM5 [file 9666498]
